# Supplementary material for: Macromonomer crosslinking polymerized scaffolds for mechanically robust and flexible perovskite solar cells
Source: Royal Society of Chemistry journal article supplement (doi:10.1039/d2ta04502h), 2022-01-01
Supplement: d2ta04502h1.pdf [file d2ta04502h1.pdf]

Electronic Supplementary Material (ESI) for Journal of Materials Chemistry A.  
This journal is © The Royal Society of Chemistry 2022

## Supporting Information

### Macromonomer Crosslinking Polymerized Scaffolds for Mechanically Robust and Flexible Perovskite Solar Cells

Tangyue Xue,<sup>†a,b</sup> Duo Chen,<sup>†c</sup> Meng Su,<sup>\*b</sup> Xiaotian Hu,<sup>\*d</sup> Zengqi Huang,<sup>b</sup> Tingqing Wu,<sup>b</sup>  
Guanghui Yu,<sup>e</sup> Ke-Jian Jiang,<sup>b</sup> Yiqiang Zhang,<sup>\*e</sup> and Yanlin Song<sup>\*b</sup>

<sup>a</sup>. School of Materials Science and Engineering, Zhengzhou University, Zhengzhou 450001, China

<sup>b</sup>. Key Laboratory of Green Printing, Institute of Chemistry Chinese Academy of Sciences (ICCAS), Beijing 100190, P. R. China. E-mail: sumeng1988@iccas.ac.cn; ylsong@iccas.ac.cn

<sup>c</sup>. School of Materials Science and Engineering, Dalian University of Technology, Dalian 116024, P. R. China

<sup>d</sup>. Institute of Polymers and Energy Chemistry, Nanchang University, Nanchang 330031, P. R. China. E-mail: happyhu@ncu.edu.cn

<sup>e</sup>. College of Chemistry, Zhengzhou University, Zhengzhou, 450001, P. R. China. E-mail: yqzhang@zzu.edu.cn.

<sup>†</sup> These authors contributed equally to this work.

## Experimental Section

### Materials

Glass/ITO and PEN/ITO were purchased from South China Xiang Science and Technology Company, Ltd.. The SnO<sub>2</sub> colloid precursor was purchased from Alfa Aesar (tin (IV) oxide, 15 wt% in H<sub>2</sub>O colloidal dispersion). Lead (II) iodide (PbI<sub>2</sub>) was purchased from GreatCell Solar. Formamidinium iodide (FAI), Methylammonium bromide (MABr), Methylammonium chloride (MACl), Cesium Iodide (CsI), 2,2,7',7'-tetrakis (N,N-di-4-methoxyphenylamine)-9,9'-spirobifluorene (Spiro-OMeTAD), 4-tert-butylpyridine (tBP) and Bis(trifluoromethylsulfonyl) amine lithium salt (Li-TFSI) were purchased from Xi'an Polymer Light Technology Corp. Chlorobenzene (CB) and isopropanol (IPA) were obtained from J&K. Dimethylformamide (DMF), dimethyl sulfoxide (DMSO), acetonitrile, ethylene glycol dimethacrylate (EGDMA) and poly(ethylene glycol) dimethacrylate (PEGDMA, Mn=550) were purchased from Sigma-Aldrich. All chemicals were used without any further purification process.

### Perovskite Solar Cell Fabrication

Glass/ITO and PET/ITO were cleaned by sonication in detergents/H<sub>2</sub>O, distilled water, and isopropanol for 20 min sequentially, then dried by N<sub>2</sub> blowing and treated by UV-ozone for 30 min. Then, a uniform and dense SnO<sub>2</sub> layer was deposited onto an ITO substrate by spin-coating SnO<sub>2</sub> nanoparticle solution (2.67% in H<sub>2</sub>O) at 4000 rpm for 30 s, and annealed in ambient air at 120 °C for 40 min. After cleaning the SnO<sub>2</sub> substrate with ultraviolet ozone for 10 min, 645.41 mg PbI<sub>2</sub>, 18.19 mg CsI, 28.69 mg MACl, 170.94 mg FAI, 11.91 mg MABr in 0.8 mL anhydrous DMF and 0.2 mL anhydrous DMSO mixture solvent DMF/DMSO mixed solvent (8:2) was spin-coated onto SnO<sub>2</sub> by two consecutive spin-coating steps (1000 rpm 10 s and 5000 rpm 30 s), and 120 µL of CB with different PEGDMA concentration was dropped onto the spinning samples at the 25th second of the second step to form a brown film. Then, the film was annealed at 150 °C for 10 min. The PEGDMA would self-polymerize during the annealing and crystallization of the perovskite film due to its cross-linking polymerization property at high temperature. Next, Spiro-OMeTAD was dissolved in chlorobenzene to prepare Spiro-OMeTAD solution with a concentration of 72.3 mg/mL, then 17.5 µL of lithium bis(trifluoromethanesulfonyl)imide in acetonitrile (520 mg/mL) and 30 µL of 4-tert-butylpyridine were added into the Spiro-OMeTAD solution. The Spiro-OMeTAD solution was

spin-coated onto the perovskite film at 4000 rpm for 30 s. Finally, an 80 nm of Au film was deposited as a counter electrode. The area of shadow mask is 0.04 cm<sup>2</sup>.

### **Films Characterization**

The morphologies of the perovskite films and the devices were measured by field emission scanning electron microscopy (FE-SEM, Hitachi, S-4800 at 5 kV, 10 mA) and the microscopic atomic force microscopy (AFM) (nanoscope multimode Bruker). The thermogravimetric analyzer (TGA) was performed on the TGA 8000 at temperature from 25 to 400 °C. The heating rate is 10 °C/min. Fourier transform infrared (FTIR) spectra were recorded in transmittance mode using IR spectrometer instrument (Bruker, Tensor-27). The NMR spectra were measured on a Bruker Avance III (FT, DCH Cryoprobe, 400 MHz) spectrometer under ambient temperature. The XRD characterization of the samples were collected by using a X'Pert powder X-ray diffractometer (Bruker D8) with monochromatic Cu K $\alpha$  radiation ( $\lambda$  = 1.5418 Å) operated at 40 kV and 40 mA. The GIXRD measurements were characterized using a Rigaku SmartLab 9Kw. GIWAXS measurements were performed using a Xeuss 2.0 spectrometer (Xenocs company) with MetalJet-D2 (Excillum) as the X-ray source and Pilatus 3R 1M (Dectris) as the detector. The absorption spectra were provided by the UV/vis spectroscopy (Shimadzu, UV-3600). Under the excitation at 485 nm, the steady-state photoluminescence (PL) and time-resolved photoluminescence (TRPL) tests were performed using steady state and lifetime spectrometer (FLS980, Edinburgh Instruments Ltd.). Laser scanning confocal microscopy (LSCM) images were obtained using NIS-Elements AR software on a confocal microscopy (Nikon Eclipse Ti). XPS and UPS measurements were recorded on a surface analysis system of AXIS Ultra DLD (Kratos Analytical) with ultrahigh vacuum.

### **Devices Characterization**

The *J-V* curves of the PSCs were obtained by using a Keithley 2400 Source Meter under simulated one-sun AM 1.5G illumination (100 mW cm<sup>-2</sup>) with a solar simulator (Enli Tech), the reference silicon solar cell was corrected from NREL. All the measurements were performed under nitrogen at room temperature. The devices were measured both in reverse scan (1.2 V  $\rightarrow$  0 V, step 0.02 V) and forward scan (0 V  $\rightarrow$  1.2 V, step 0.02 V), and the active area was defined by a shadow mask (0.04 cm<sup>2</sup>). The light intensity was calibrated by a standard silicon cell with KG-5 filter. Steady-state power conversion efficiency was calculated by measuring stabilized photocurrent density under constant bias voltage (*V*<sub>max</sub> point). The

incident photo-to-electron conversion efficiency spectra (IPCE) were conducted by a monochromatic illumination optical system (Enli Tech, QE-R) with wavelength from 300 to 900 nm, calibrated by a Si reference solar cell. The repeated bending cycle tests are performed by a custom-made stretching machine, which was actuated by a stepper motor (Beijing Zhongke J&M). The EIS characteristics were determined on an electrochemical analyzer (ZAHENR, Germany). All the results of bending tests were averaged from over 50 samples.

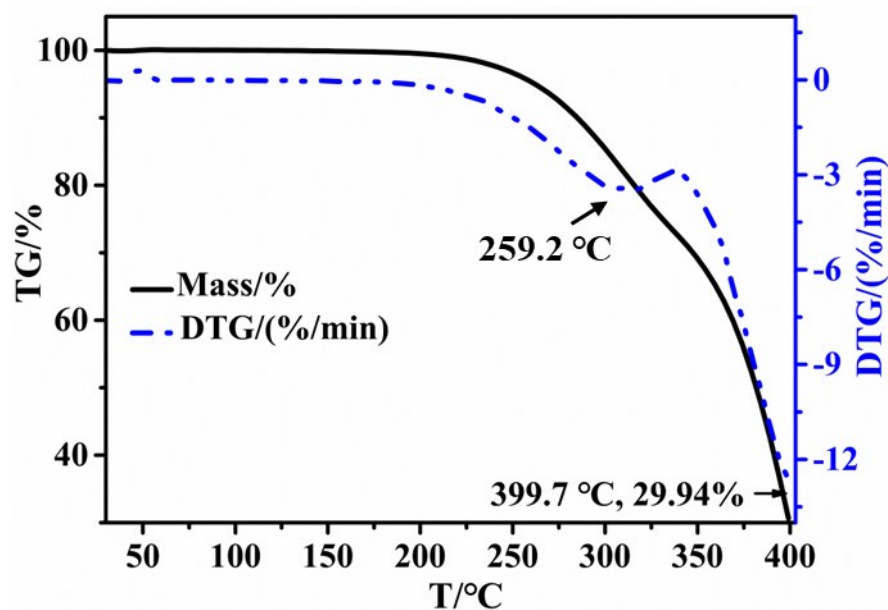

**Fig. S1.** Thermogravimetric analysis (TGA) of PEGDMA. The PEGDMA exhibits excellent thermostability with the decomposition temperature up to 250 °C, much higher than the processing temperatures (~150 °C) for the perovskite films in our experiments, making ensure that the SMPU remains in the perovskite films after the processing.

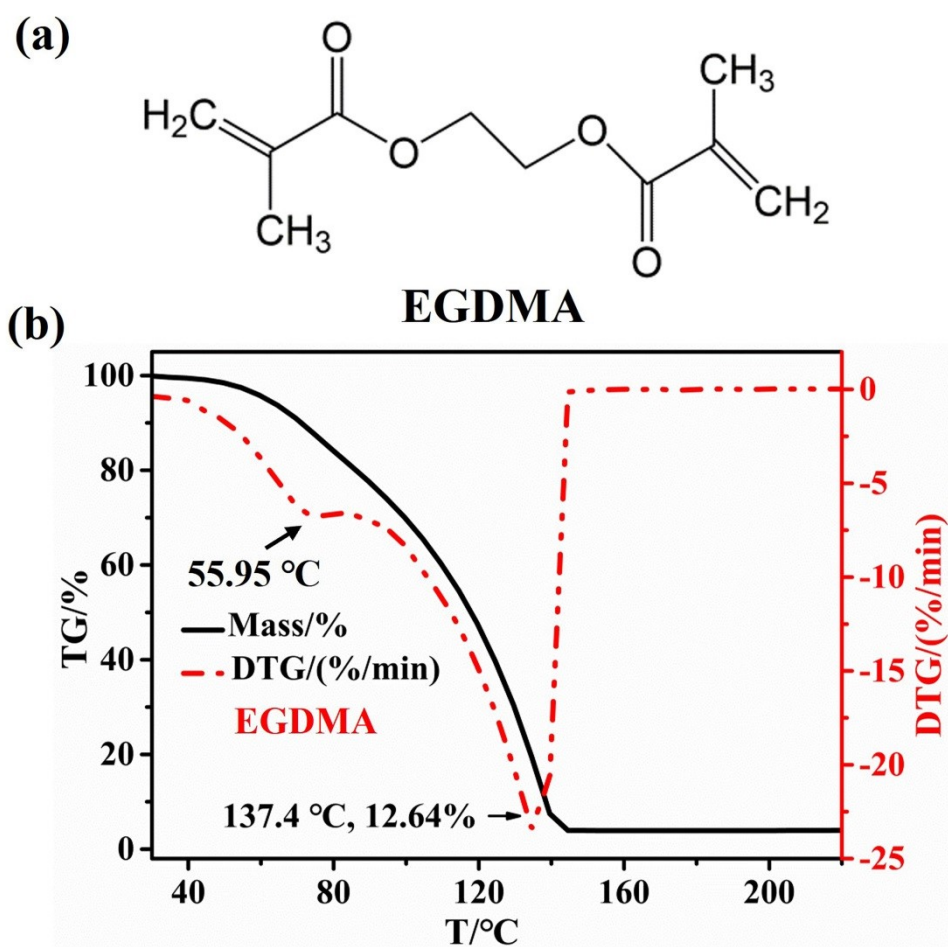

**Fig. S2.** (a) Molecular structure of EGDMA. (b) TGA of EGDMA. The thermal decomposition temperature of EGDMA is about 130 °C, which is lower than the annealing temperature of 150 °C for perovskite, so it cannot effectively participate in the whole process of perovskite film crystal growth.

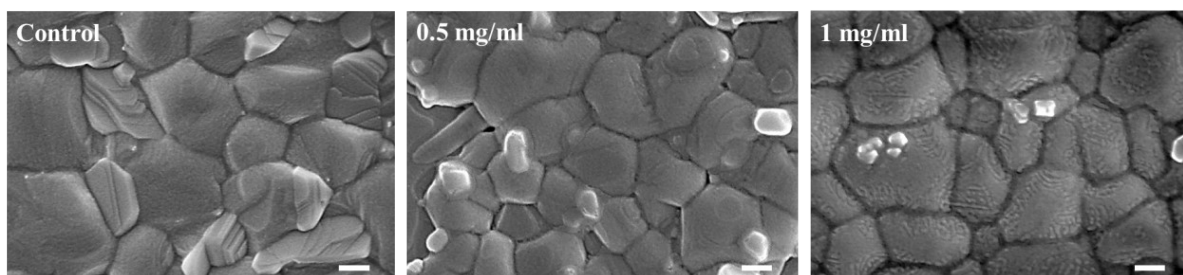

**Fig. S3.** Top-view SEM images of perovskite films with different concentrations of EGDMA (Scale bar: 200 nm). The grain size of the perovskite film with the addition of EGDMA monomer did not change significantly, but the grain boundaries effectively filled the polymer, indicating that the addition of monomer can reduce the grain boundaries defects.

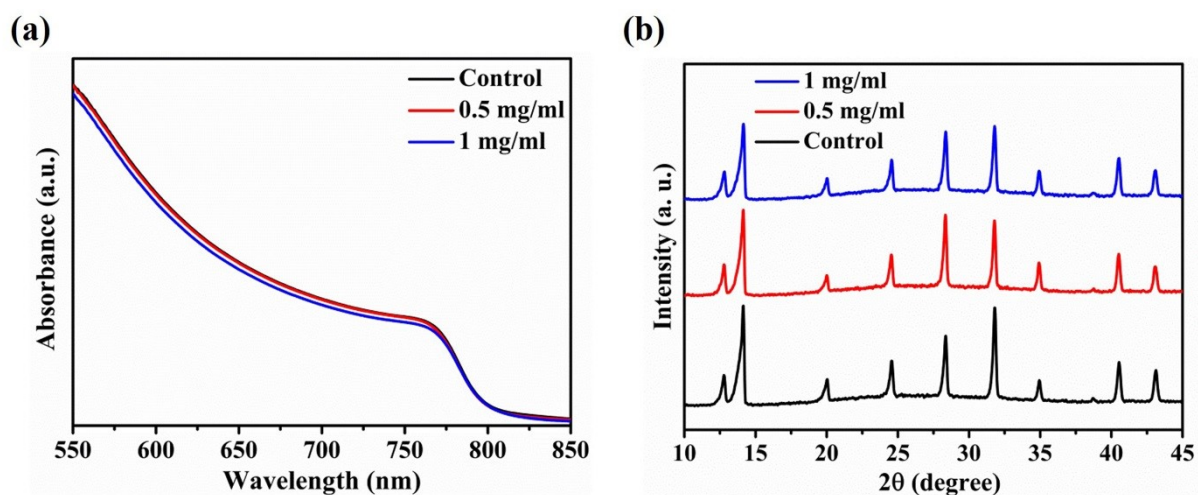

**Fig. S4.** (a) UV/Vis absorption spectra and (b) X-ray diffraction (XRD) patterns of the control and EGDMA-added perovskite films. Compared with the reference films, there is no obvious UV/Vis absorption edge and crystallization peak change of the X-ray diffraction (XRD) pattern in the EGDMA-added films.



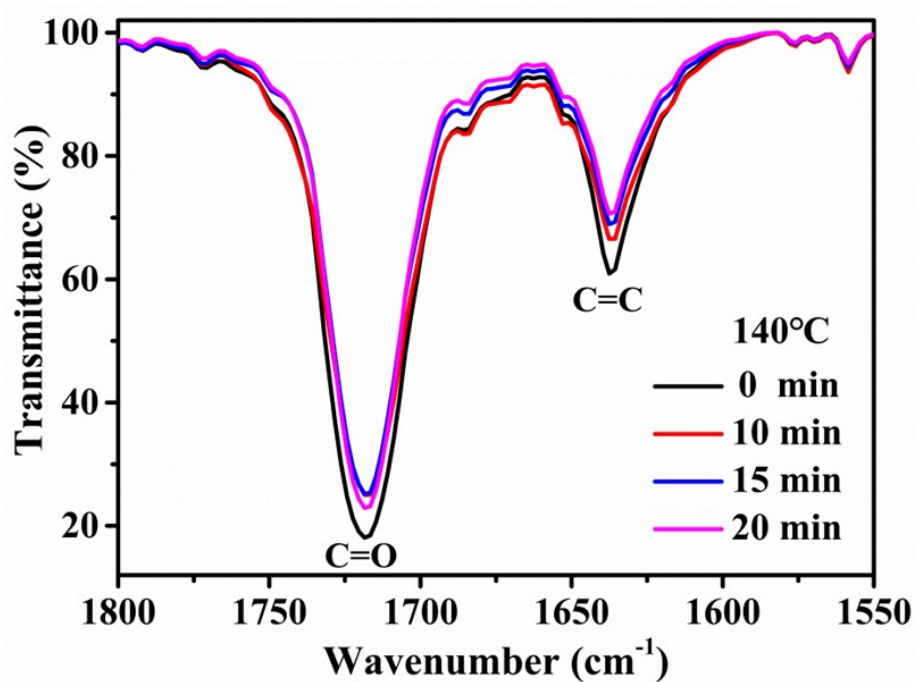

**Fig. S5.** FT-IR spectra of PEGDMA heated at 140 °C for different time. The results show that the C=O peak (1720 cm<sup>-1</sup>) is relatively stable, while the C=C peak (1639 cm<sup>-1</sup>) gradually decreases with the increase of heating time.<sup>1</sup>

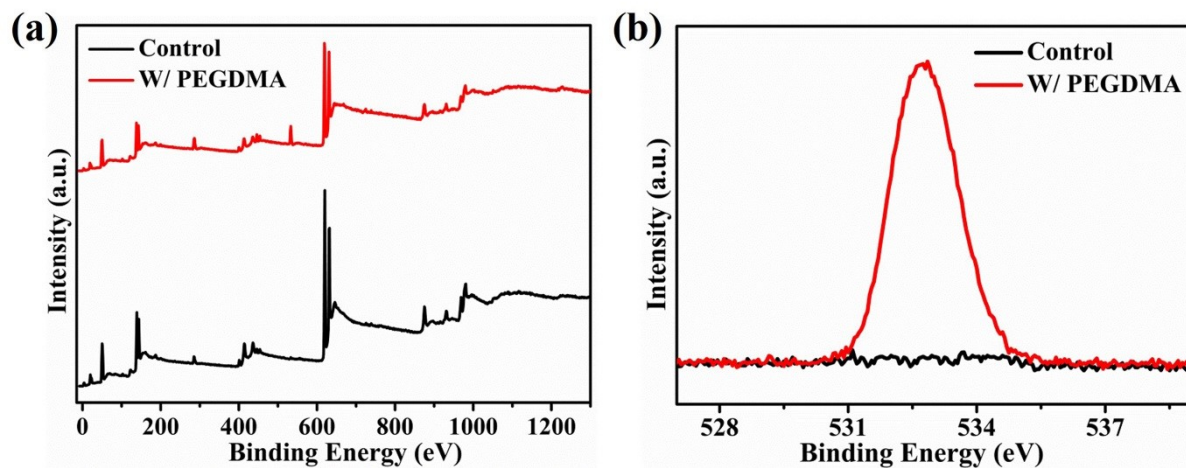

**Fig. S6.** XPS spectra of (a) entire elements and (b) O 1s for the control and PEGDMA-added perovskite film. The O 1s peak also verifies the successful introduction of O atoms into the perovskite films.

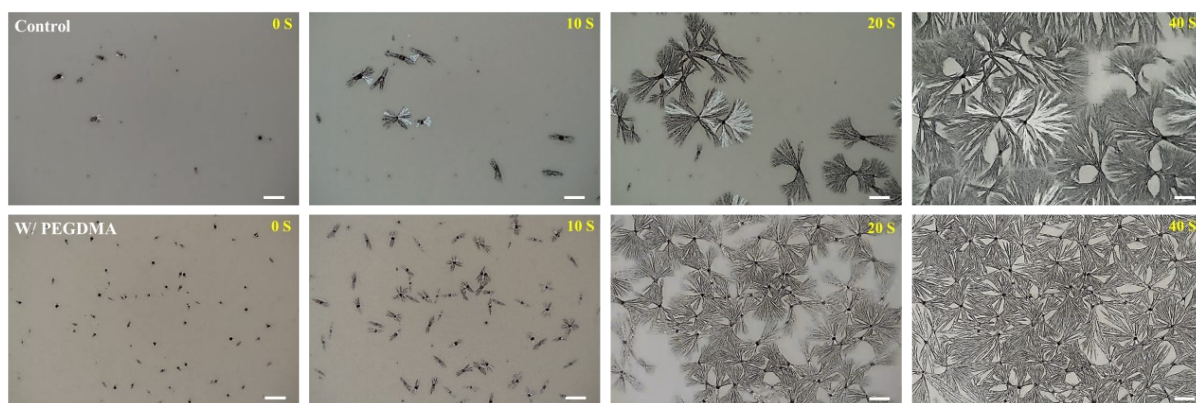

**Fig. S7.** The optical images of the crystallization nucleation process of perovskite films (Scale bar: 10  $\mu\text{m}$ ). At 0 s, several agglomerated nuclei appear in the control perovskite film, which grow rapidly and disorderly after 40 s. Interestingly, the PEGDMA-added films formed more uniform nuclei. Over time, multiregional crystals orderly grow in the whole film.

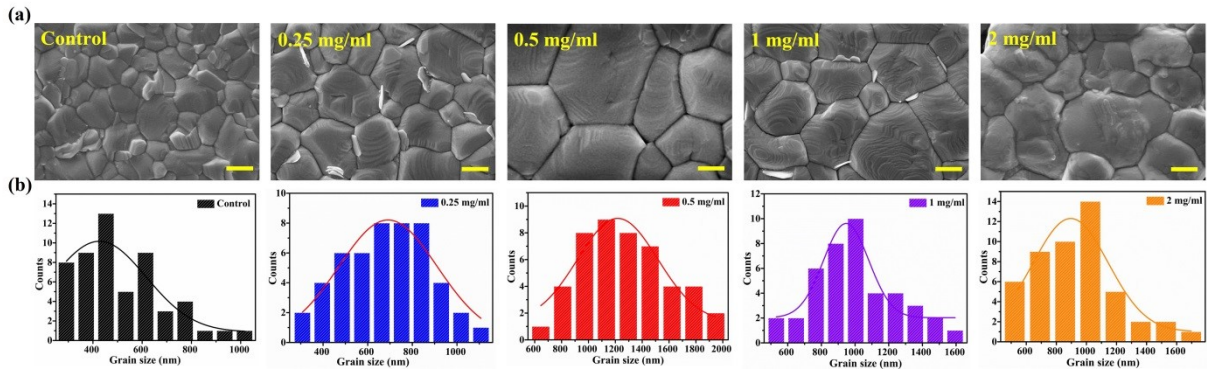

**Fig. S8.** Top-view SEM images and corresponding histogram of final grain size for the perovskite film with different PEGDMA contents (Scale bar: 500 nm). The grain size of the control perovskite film is approximately 510 nm. Compared with the control perovskite film, the grain size of the films with PEGDMA increased significantly (0.25, 0.5, 1, 2 mg/ml), and the maximum grain size is about 1200 nm when adding 0.5 mg/ml PEGDMA. The results indicate that PEGDMA is beneficial for regulating the growth of perovskite film.

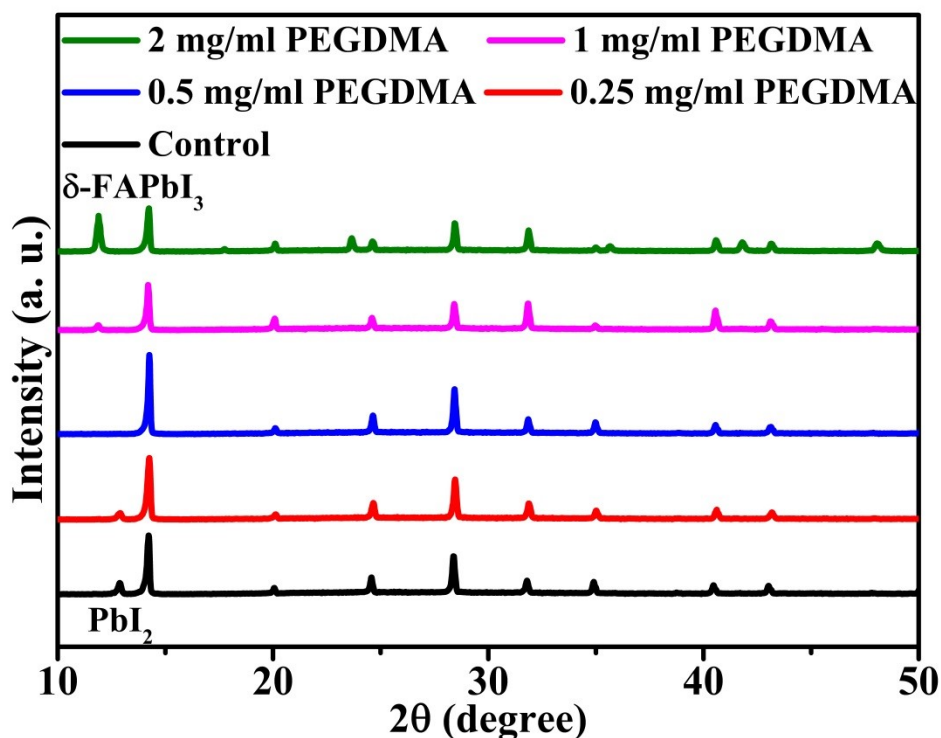

**Fig. S9.** XRD patterns of perovskite film with different PEGDMA contents. It is found that the remarkable PbI<sub>2</sub> peak located at 12.7° is obviously weakened or disappeared, indicating that the formation of PbI<sub>2</sub> has been inhibited to an appropriate amount, which is more conducive to the passivation grain boundary defects. In addition, the  $\delta$ -FAPbI<sub>3</sub> appears with the increase of PEGDMA concentration, which limits the stability of the film. Therefore, 0.5 mg/ml is the most suitable addition amount.

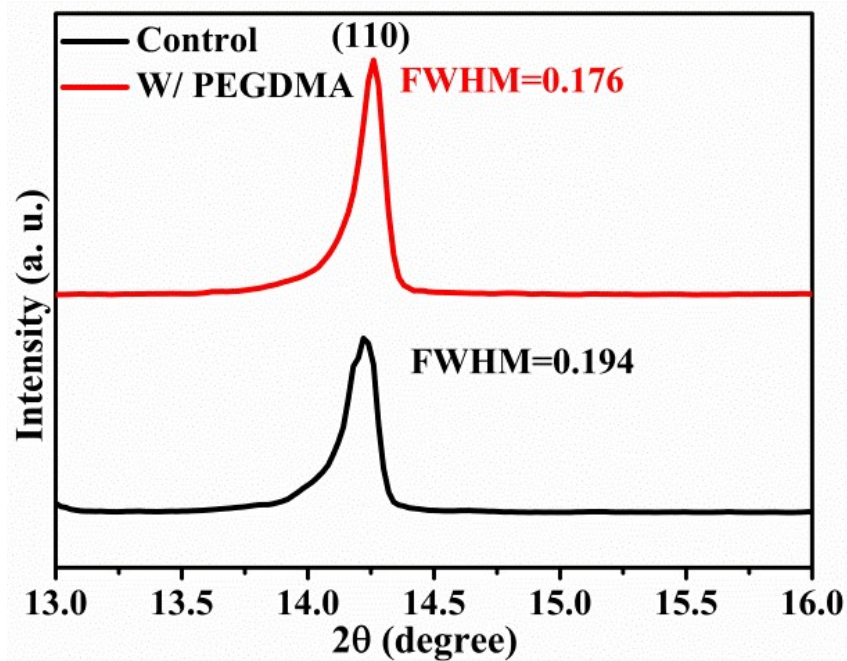

**Fig. S10.** (a) Magnification (110) X-ray diffraction (XRD) patterns of the control and PEGDMA-added perovskite films. The XRD peaks are fitted by the Voigt function. The FWHM value of the PEGDMA-added perovskite film at (110) crystal planes is 0.176, while the reference value is 0.194. The above results demonstrate that the crystallinity of the perovskite films can be significantly improved by incorporating PEGDMA.

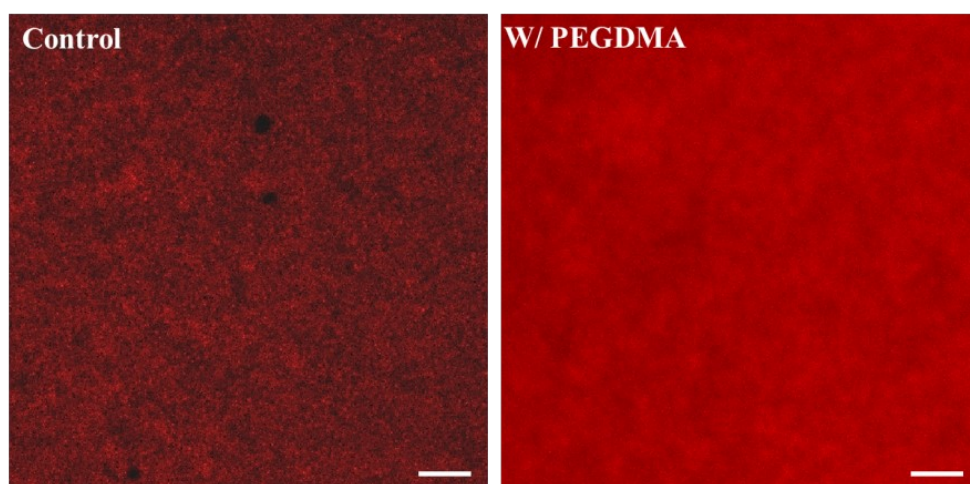

**Fig. S11.** Laser scanning confocal PL mapping images of the control and PEGDMA-added perovskite films (Scale bar: 10  $\mu\text{m}$ ). It indicates that PEGDMA-added perovskite films have a uniform red emission range from 700 to 800 nm, while many black holes are randomly distributed on the control film. These phenomena are consistent with the PL results.

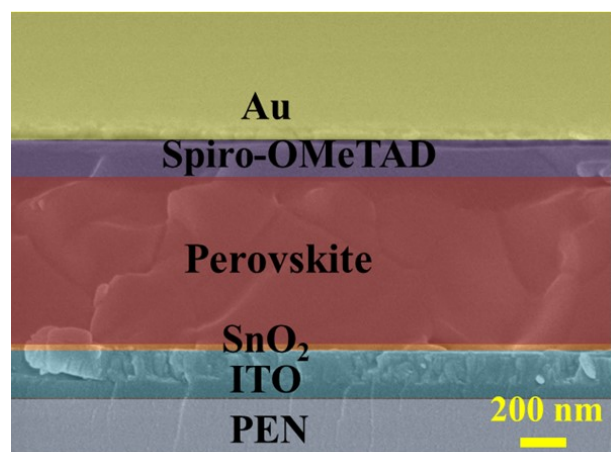

**Fig. S12.** Cross-sectional SEM image of the control device.



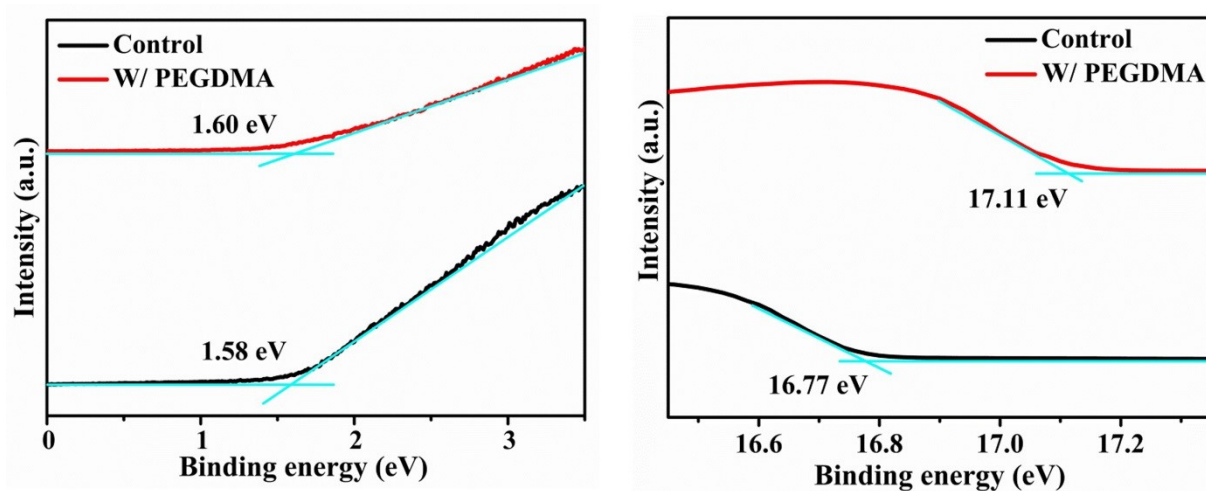

**Fig. S13.** UPS spectra of control and PEGDMA perovskite films for (a) low binding energy region, (b) high binding energy region.

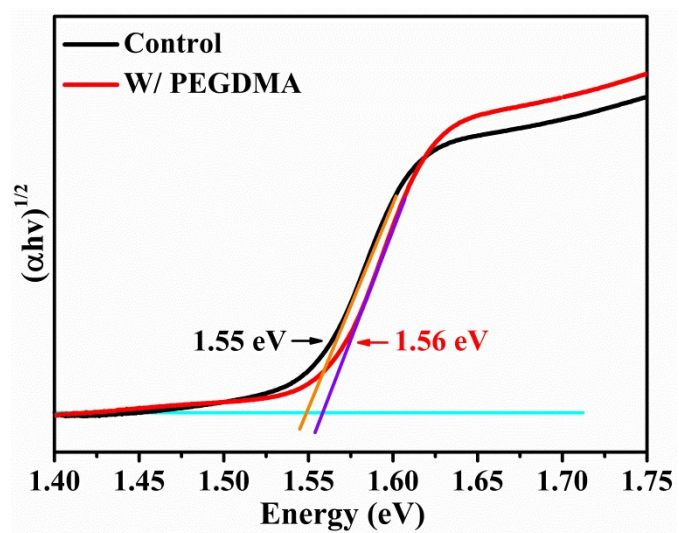

**Fig. S14.** The bandgap of the perovskite films calculated from UV-vis spectra.

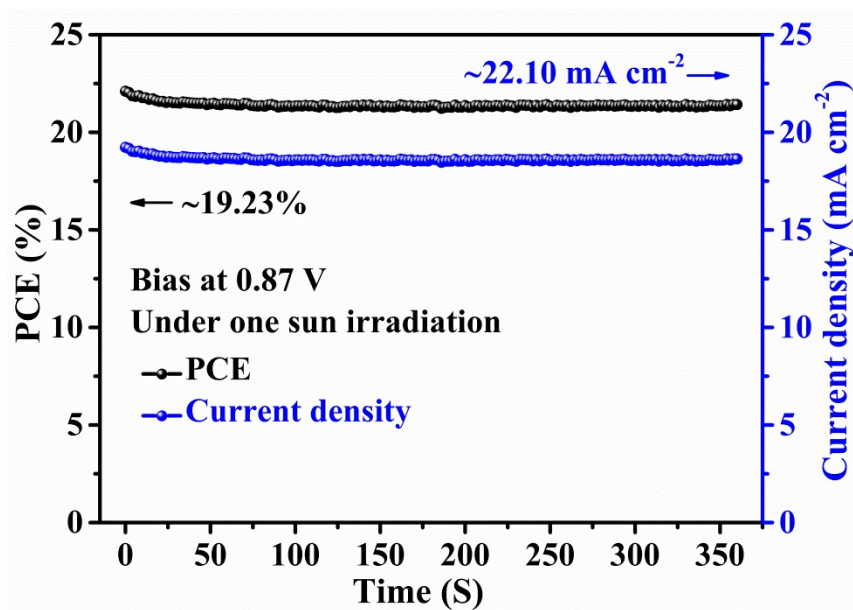

**Fig. S15.** The stabilized output power and photocurrent of the control flexible PSCs measured under a constant bias voltage (0.87 V) near the maximum power point.

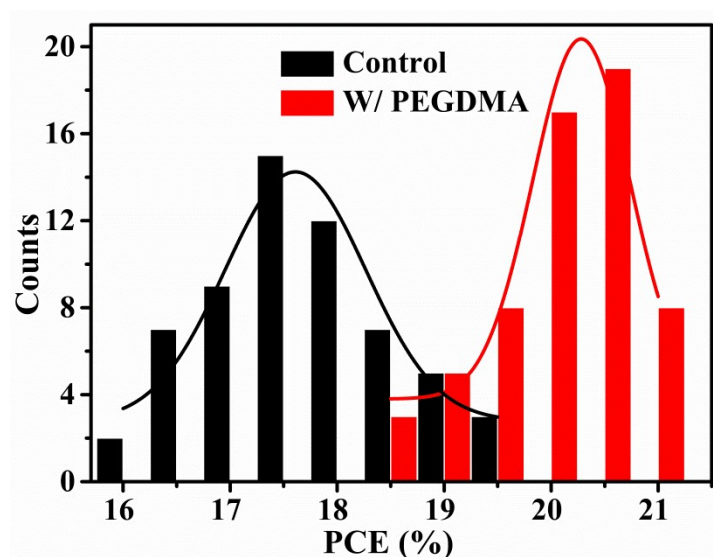

**Fig. S16.** Histograms of the PCE distribution among 60 flexible devices with and without PEGDMA.

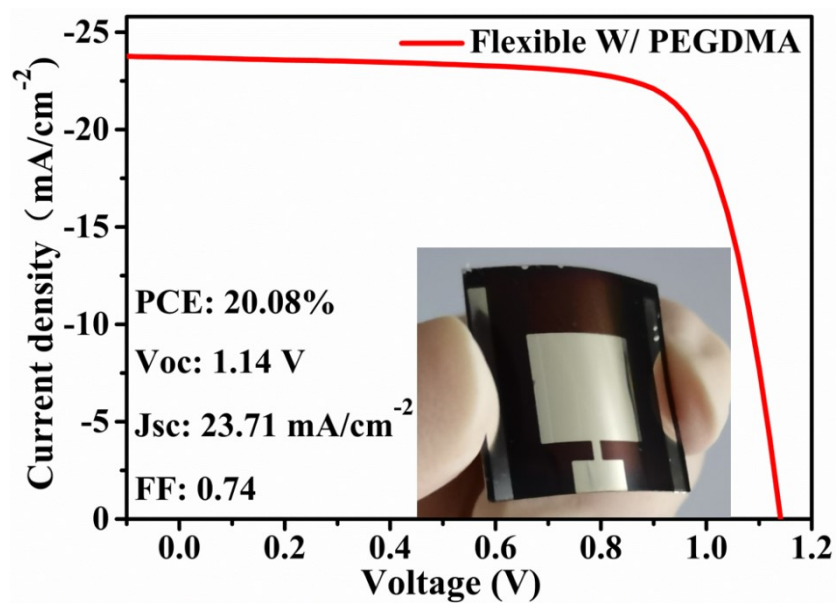

**Fig. S17.** The J-V curves of the large area flexible PSCs with PEGDMA. The inset photograph shows a large-area flexible PSC.

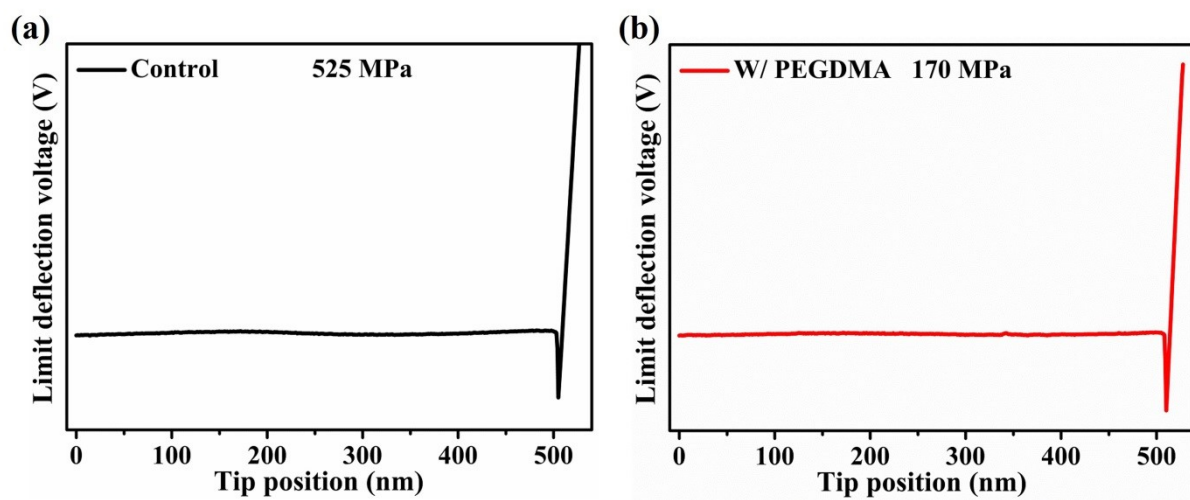

**Fig. S18.** Young's Modulus of the control and PEGDMA-added perovskite film measured by the peak-force model of AFM.

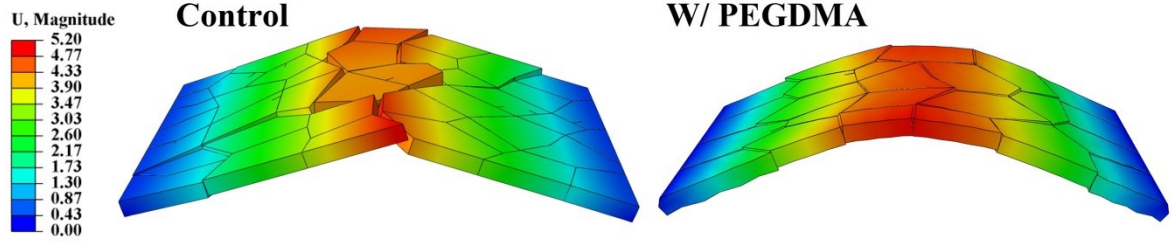

**Fig. S19.** The finite element analysis of the displacement distribution of the control and PEGDMA-added perovskite films under large bending deformation. Under the same bending defelection, the control perovskite film has obvious cracks. While, the PEGDMA-added perovskite film is still relatively intact.

A cohesive zone model is employed to simulate the fracture evolution and crack propagation in polycrystalline solids. The simulation samples are constructed though the part module of Abaqus/CAE. The cohesive elements are distributed at the grain boundaries of perovskite films. A constitutive model of cohesive elements with linear elasticity-linear softening is adopted to simulate the stress distribution of perovskite films under different bending deflections. Quadratic nominal stress criterion (Quads damage) is used to judge initial damage. The quads damage can be described as<sup>2</sup>:

$$\left\{ \frac{\sigma_n}{\sigma_n^0} \right\}^2 + \left\{ \frac{\tau_s}{\tau_s^0} \right\}^2 + \left\{ \frac{\tau_t}{\tau_t^0} \right\}^2 = 1$$

$\sigma_n^0$ ,  $\tau_s^0$ ,  $\tau_t^0$  represent normal stress, stress in the first shear direction, and stress in the second shear direction of cohesive elements, respectively. In this manuscript, the cohesive zone parameters are measured by ASDM D897<sup>3</sup> and ASTM D1002<sup>4</sup>. The corresponding mechanical properties of cohesive elements used for finite-element simulation via abaqus software are shown in **Table S7**.

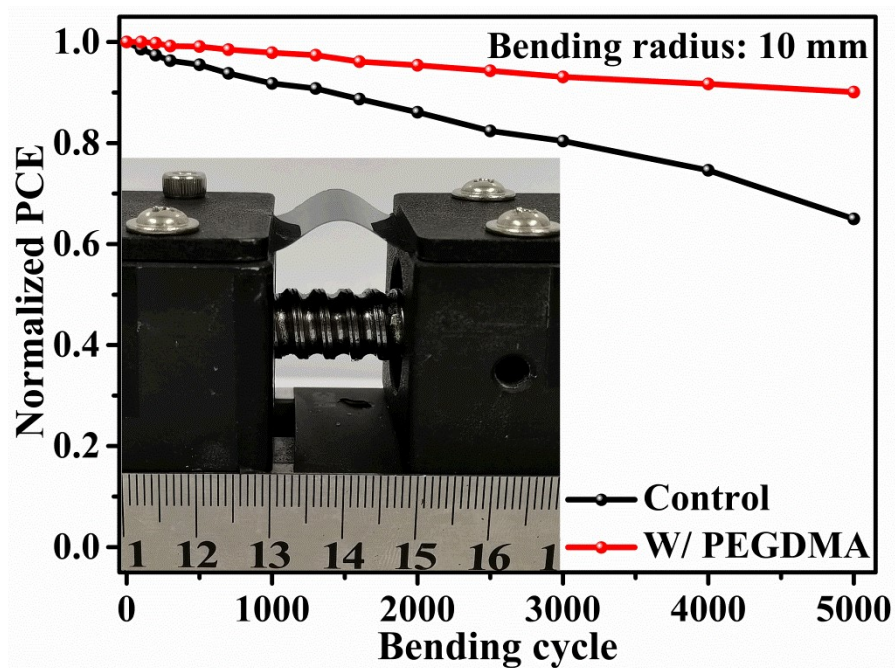

**Fig. S20.** Normalized average PCE of PSCs as a function of bending cycles with bending radius of 10 mm.



**Table S1.** The characteristic peak intensities and ratios in the XRD patterns.

| <b>Content</b>   | <b>(110)</b> | <b>(310)</b> | <b>(110)/(310)</b> |
|------------------|--------------|--------------|--------------------|
| <b>Control</b>   | 1849         | 444          | 4.16               |
| <b>W/ PEGDMA</b> | 2477         | 482          | 5.13               |

**Table S2.** The half-width of peak strength of the perovskite films with and without PEGDMA.

| <b>Content</b>   | <b>Main peak position (°)</b> | <b>FWHM (main peak)</b> |
|------------------|-------------------------------|-------------------------|
| <b>Control</b>   | 14.22                         | 0.194                   |
| <b>W/ PEGDMA</b> | 14.26                         | 0.176                   |

**Table S3.**  $\tau_1$  and  $\tau_2$  from PL decay spectra with different samples.

| Samples   | $\tau_1$ (ns) | $A_1$ (%) | $\tau_2$ (ns) | $A_2$ (%) | $\tau$ (ns) |
|-----------|---------------|-----------|---------------|-----------|-------------|
| Control   | 153.58        | 6.64      | 588.96        | 93.36     | 560.05      |
| W/ PEGDMA | 105.93        | 1.18      | 1155.43       | 98.82     | 1143.05     |

The PL decay fitting curve is based on a bi-exponential rate law:

$$f(t) = A_1 \exp(-t/\tau_1) + A_2 \exp(-t/\tau_2) + y_0$$

Where  $A_1$  and  $A_2$  represent the decay amplitude,  $\tau_1$  represents trap-assisted recombination, and  $\tau_2$  demonstrates free carrier recombination, and  $y_0$  is a constant.

**Table S4.** Calculated parameters of the control and PEGDMA incorporated device from UPS.

| Devices   | $E_{\text{cutoff}}$ (eV) | $E_F$ (eV) | $E_{\text{onset}}$ (eV) | $E_{\text{VBM}}$ (eV) | $E_g$ (eV) | $E_{\text{CBM}}$ (eV) |
|-----------|--------------------------|------------|-------------------------|-----------------------|------------|-----------------------|
| Control   | 16.77                    | 4.45       | 1.58                    | 6.03                  | 1.55       | 4.48                  |
| W/ PEGDMA | 17.11                    | 4.11       | 1.60                    | 5.71                  | 1.56       | 4.15                  |

where the Fermi energy:  $E_F = 21.22 \text{ eV (He I)} - E_{\text{cutoff}}$

Valence band maximum energy:  $E_{\text{VBM}} = E_{\text{onset}} + E_F$

Conduction band minimum energy:  $E_{\text{CBM}} = E_{\text{VBM}} + E_g$

**Table S5.** Performances of several representative flexible PSCs for comparison with this work.

| Configuration                                                                        | Notes                                                 | Effective area (cm <sup>2</sup> ) | PCE (%)      | Ref.             |
|--------------------------------------------------------------------------------------|-------------------------------------------------------|-----------------------------------|--------------|------------------|
| PET/ITO/SnO <sub>2</sub> /C60-SAM/PVK/Spiro-OMeTAD/Au                                | Pb(SCN) <sub>2</sub> additive                         | 0.08                              | 17.96        | 5                |
| PET/ITO/PVK:C-PCBOD/Spiro-OMeTAD/MoO <sub>3</sub> /Ag                                | Grains embraced MAPbI <sub>3</sub> :C-PCBOD           | 0.07                              | 18.1         | 6                |
| MgF <sub>2</sub> /PET/ITO/Nb <sub>2</sub> O <sub>5</sub> /PVK-DS/Spiro-OMeTAD/Au     | Dimethyl sulfide additive                             | 0.052                             | 18.40        | 7                |
| PDMS/hc-PEDOT:PSS/PEDOT:PSS Al4083/PVK/PCBM/polyethyleneimine(PEI)/hc-PEDOT:PSS/PDMS | dynamic oxime-carbamate bonds self-healing            | 0.16                              | 19.15        | 8                |
| PDMS/hc-PEDOT:PSS/PEDOT:PSS Al4083/PVK/PCBM/hc-PEDOT:PSS/PDMS                        | Hydrogen bonding self-healing                         | 0.09                              | 19.5         | 9                |
| PDMS/PEDOT:PSS/PEDOT:PSS/PVK/PEI/PEDOT:PSS/PDMS                                      | Elastic “brick-and-mortar” structure                  | 1.0                               | 19.59        | 10               |
| MgF <sub>2</sub> /Willow Glass/ITO/PTAA/MAPbI <sub>3</sub> /C60/BCP/Cu               | NH <sub>4</sub> Cl addition                           | 0.08                              | 19.72        | 11               |
| FG/ITO/PTAA/PFN-Br/PVK/C60/BCP/Cu                                                    | elastic grain boundary encapsulation                  | -                                 | 20           | 12               |
| PEN/ITO/FI-SnO <sub>2</sub> /PVK Spiro-OMeTAD/Au                                     | FI-SnO <sub>2</sub> /perovskite interface             | 0.16                              | 20.1         | 13               |
| PET/hc-PEDOT:PSS/PVK:s-GO/PCBM/Ag                                                    | s-GO-modified perovskite film                         | 1.01                              | 20.56        | 14               |
| PET/ITO/SnO <sub>2</sub> /LD/3D MHP/Spiro-OMeTAD/Au                                  | LD MHP capping layer                                  | 0.096                             | 21.0         | 15               |
| PEN/ITO/HfO <sub>x</sub> /SnO <sub>2</sub> /PVK/Spiro-OMeTAD/Au                      | artemisinin-doped perovskite layer                    | -                                 | 21.1         | 16               |
| <b>PEN/ITO/SnO<sub>2</sub>/PVK/Spiro-OMeTAD/Au</b>                                   | <b>In-situ cross-linking polymerization of PEGDMA</b> | <b>0.04</b>                       | <b>21.41</b> | <b>This work</b> |

**Table S6.** Photovoltaic parameters of the flexible PSCs (0.04 cm<sup>2</sup>) with PEGDMA.

| Sample No. | Jsc (mA cm <sup>-2</sup> ) | Voc (V)     | FF       | PCE (%)  |
|------------|----------------------------|-------------|----------|----------|
| 1          | 24.27110157                | 1.150150324 | 76.69794 | 21.41055 |
| 2          | 24.24566279                | 1.144459307 | 75.45304 | 20.93684 |
| 3          | 24.09041655                | 1.122199986 | 74.91449 | 20.25258 |
| 4          | 24.37060262                | 1.116017872 | 74.40629 | 20.23704 |
| 5          | 23.54741184                | 1.129359151 | 77.22492 | 20.5368  |
| 6          | 23.70774018                | 1.136581804 | 76.69359 | 20.66569 |
| 7          | 23.81994069                | 1.165699222 | 75.56333 | 20.98158 |
| 8          | 24.24423699                | 1.165817183 | 72.96236 | 20.62233 |
| 9          | 24.12443981                | 1.157486514 | 72.68335 | 20.29589 |
| 10         | 23.96893688                | 1.157002951 | 73.61094 | 20.41388 |
| 11         | 24.36109498                | 1.151092864 | 74.1847  | 20.80279 |
| 12         | 23.8087168                 | 1.14744902  | 71.30806 | 19.48085 |
| 13         | 23.54741184                | 1.129359151 | 77.22492 | 20.5368  |
| 14         | 23.47089641                | 1.130253061 | 75.67214 | 20.07435 |
| 15         | 23.71312759                | 1.130762905 | 75.5389  | 20.25494 |
| 16         | 24.11959314                | 1.135341607 | 75.67156 | 20.72188 |
| 17         | 24.42648198                | 1.158246013 | 74.3634  | 21.0388  |
| 18         | 23.611465                  | 1.126699939 | 72.41716 | 19.26516 |
| 19         | 23.34761142                | 1.133125063 | 72.8478  | 19.27244 |
| 20         | 23.78781384                | 1.090976297 | 76.93249 | 19.96547 |
| 21         | 24.13894777                | 1.10034894  | 76.16403 | 20.23013 |
| 22         | 24.10788351                | 1.09306917  | 75.61367 | 19.9254  |
| 23         | 24.11619294                | 1.121631306 | 76.94465 | 20.81312 |
| 24         | 23.783613                  | 1.142603439 | 73.98412 | 20.10536 |
| 25         | 24.34903086                | 1.132385139 | 77.16692 | 21.27684 |
| 26         | 23.83898303                | 1.138187875 | 73.02265 | 19.81341 |
| 27         | 24.29265558                | 1.141196885 | 74.35346 | 20.61279 |
| 28         | 23.53225631                | 1.125616995 | 74.56367 | 19.75065 |
| 29         | 23.41736952                | 1.123690907 | 76.0218  | 20.00429 |
| 30         | 24.28705746                | 1.134641408 | 76.79212 | 21.16168 |

**Table S7.** Cohesive zone model parameters for the finite-element simulation.

| Parameter | Normal stress<br>(N/m <sup>2</sup> ) | 1 <sup>st</sup><br>direction<br>Shear<br>strength<br>(N/m <sup>2</sup> ) | 2 <sup>nd</sup><br>direction<br>shear<br>strength<br>(N/m <sup>2</sup> ) | Normal<br>fracture<br>energy<br>(N/m) | 1 <sup>st</sup><br>Shear<br>fracture<br>energy<br>(N/m) | 2 <sup>nd</sup> Shear<br>fracture<br>energy<br>(N/m) |
|-----------|--------------------------------------|--------------------------------------------------------------------------|--------------------------------------------------------------------------|---------------------------------------|---------------------------------------------------------|------------------------------------------------------|
| Value     | 100000                               | 80000                                                                    | 80000                                                                    | 100                                   | 120                                                     | 120                                                  |

## References

1. B. Niu, H. Wu, J. Yin, B. Wang, G. Wu, X. Kong, B. Yan, J. Yao, C.-Z. Li, H. Chen, *ACS Energy Lett.*, 2021, **6**, 3443-3449.
2. M. A. Bellali, B. Serier, M. Mokhtari, R. D. S. G. Campilho, F. Lebon, H. Fekirini, *Compos. Struct.*, 2021, **266**, 113805.
3. G. L. Anderson, *J. Adhes.*, 2006, **41**, 129-137.
4. H. Y. Yeh, D. Tandjung, J. Reinf. *Plast. Compos.*, 2016, **24**, 839-853.
5. C. Wang, D. Zhao, Y. Yu, N. Shrestha, C. R. Grice, W. Liao, A. J. Cimaroli, J. Chen, R. J. Ellingson, X. Zhao, Y. Yan, *Nano Energy*, 2017, **35**, 223-232.
6. M. Li, Y. G. Yang, Z. K. Wang, T. Kang, Q. Wang, S. H. Turren-Cruz, X. Y. Gao, C. S. Hsu, L. S. Liao, A. Abate, *Adv. Mater.*, 2019, **31**, e1901519.
7. J. Feng, X. Zhu, Z. Yang, X. Zhang, J. Niu, Z. Wang, S. Zuo, S. Priya, S. F. Liu, D. Yang, *Adv. Mater.*, 2018, **30**, e1801418.
8. X. Meng, Z. Xing, X. Hu, Z. Huang, T. Hu, L. Tan, F. Li, Y. Chen, *Angew. Chem. Int. Ed.*, 2020, **59**, 16602-16608.
9. K. Zhang, Y. Deng, X. Shi, X. Li, D. Qi, B. Jiang, Y. Huang, *Angew. Chem. Int. Ed.*, 2022, **61**, e202112673.
10. X. Hu, Z. Huang, F. Li, M. Su, Z. Huang, Z. Zhao, Z. Cai, X. Yang, X. Meng, P. Li, Y. Wang, M. Li, Y. Chen, Y. Song, *Energy Environ. Sci.*, 2019, **12**, 979-987.
11. X. Dai, Y. Deng, C. H. Van Brackle, S. Chen, P. N. Rudd, X. Xiao, Y. Lin, B. Chen, J. Huang, *Adv. Energy Mater.*, 2019, **10**, 1903108.
12. C. Ge, Z. Yang, X. Liu, Y. Song, A. Wang, Q. Dong, *CCS Chem.*, 2021, **3**, 2035-2044.
13. Q. Dong, C. Zhu, M. Chen, C. Jiang, J. Guo, Y. Feng, Z. Dai, S. K. Yadavalli, M. Hu, X. Cao, Y. Li, Y. Huang, Z. Liu, Y. Shi, L. Wang, N. P. Padture, Y. Zhou, *Nat. Commun.*, 2021, **12**, 973.
14. X. Hu, X. Meng, X. Yang, Z. Huang, Z. Xing, P. Li, L. Tan, M. Su, F. Li, Y. Chen, Y. Song, *Sci. Bull.*, 2021, **66**, 527-535.
15. Q. Dong, M. Chen, Y. Liu, F. T. Eickemeyer, W. Zhao, Z. Dai, Y. Yin, C. Jiang, J. Feng, S. Jin, S. Liu, S. M. Zakeeruddin, M. Grätzel, N. P. Padture, Y. Shi, *Joule*, 2021, **5**, 1587-1601.
16. L. Yang, Q. Xiong, Y. Li, P. Gao, B. Xu, H. Lin, X. Li, T. Miyasaka, *J. Mater. Chem. A*, 2021, **9**, 1574-1582.
